# Supplementary material for: Inherent Signals in Sequencing-Based Chromatin-ImmunoPrecipitation Control Libraries
Source: PubMed Central journal article supplement (PMC2666154; doi:10.1371/journal.pone.0005241), 2009-04-15
Supplement: pone.0005241.s003.pdf [file pone.0005241.s003.pdf]

## Supplementary Figure S1

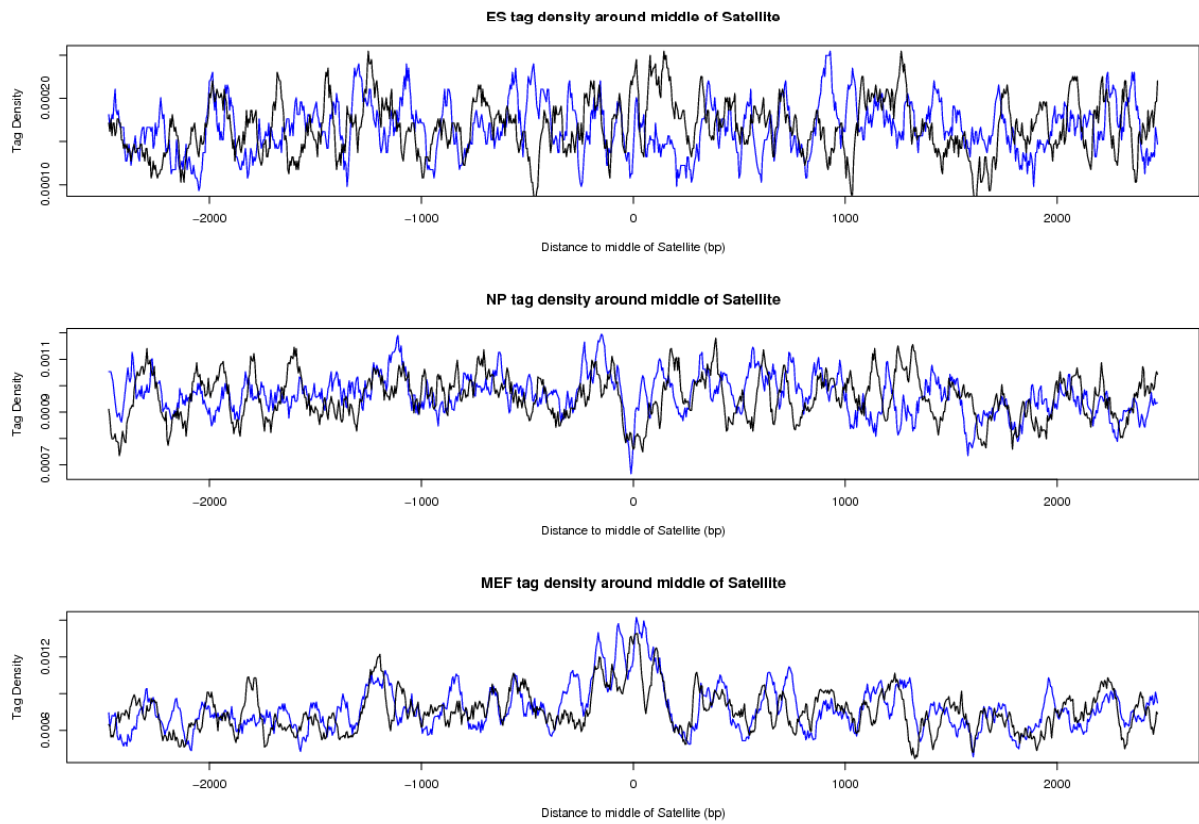

**Supplementary Figure S1.** Comparative density profiles of tags mapped to forward strand (black lines) and reverse strand (blue lines) in a 5kbp window centered around middle of Satellite repeats. As the enrichment of tags in Satellite repeats were likely to be resulted from mapping issues and other random noise, no well-positioned fragment was expected, resulted in closely correlating density profile of forward tags and reverse tags.
