# Supplementary material for: Inherent Signals in Sequencing-Based Chromatin-ImmunoPrecipitation Control Libraries
Source: PubMed Central journal article supplement (PMC2666154; doi:10.1371/journal.pone.0005241), 2009-04-15
Supplement: pone.0005241.s005.pdf [file pone.0005241.s005.pdf]

### Supplementary Figure S3

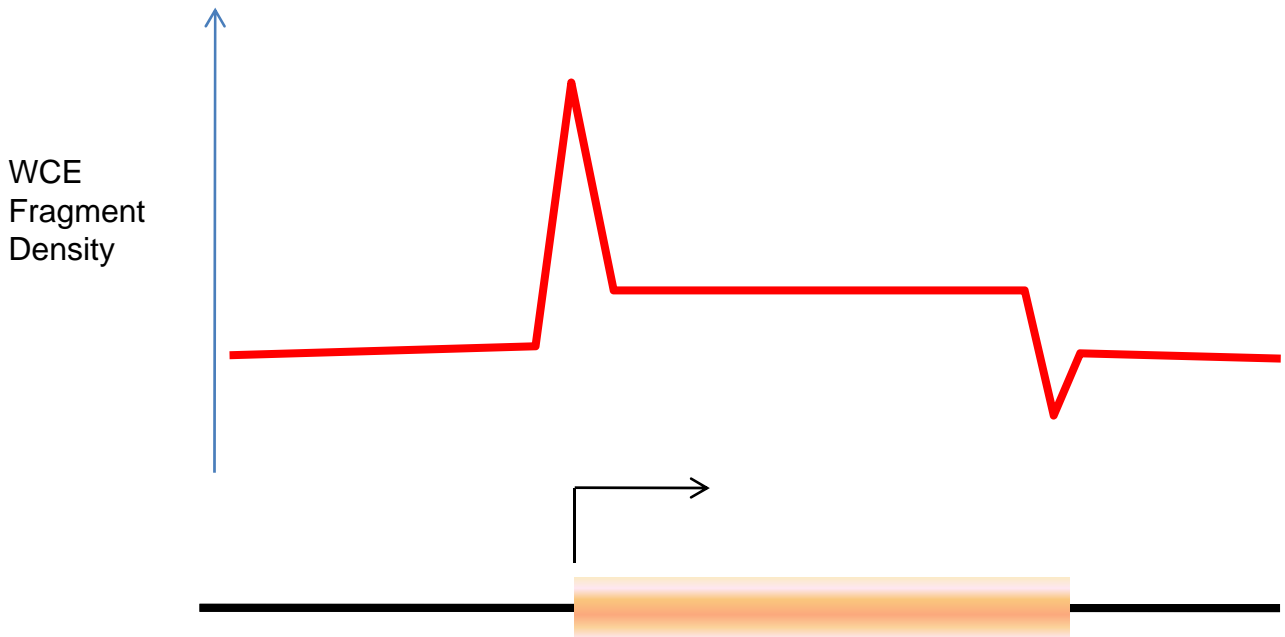

**Supplementary Figure S3.** A schematic model of WCEseq fragments distribution across a typical gene, based on observations in Figures 4 and 5. Gene region is expected to be more fragment-rich than the immediate upstream and downstream regions, with the TSS marked with a substantial increase of fragment count and the TES punctuated with lower fragment count.
