# Supplementary material for: Inherent Signals in Sequencing-Based Chromatin-ImmunoPrecipitation Control Libraries
Source: PubMed Central journal article supplement (PMC2666154; doi:10.1371/journal.pone.0005241), 2009-04-15
Supplement: pone.0005241.s006.pdf [file pone.0005241.s006.pdf]

## Supplementary Figure S4

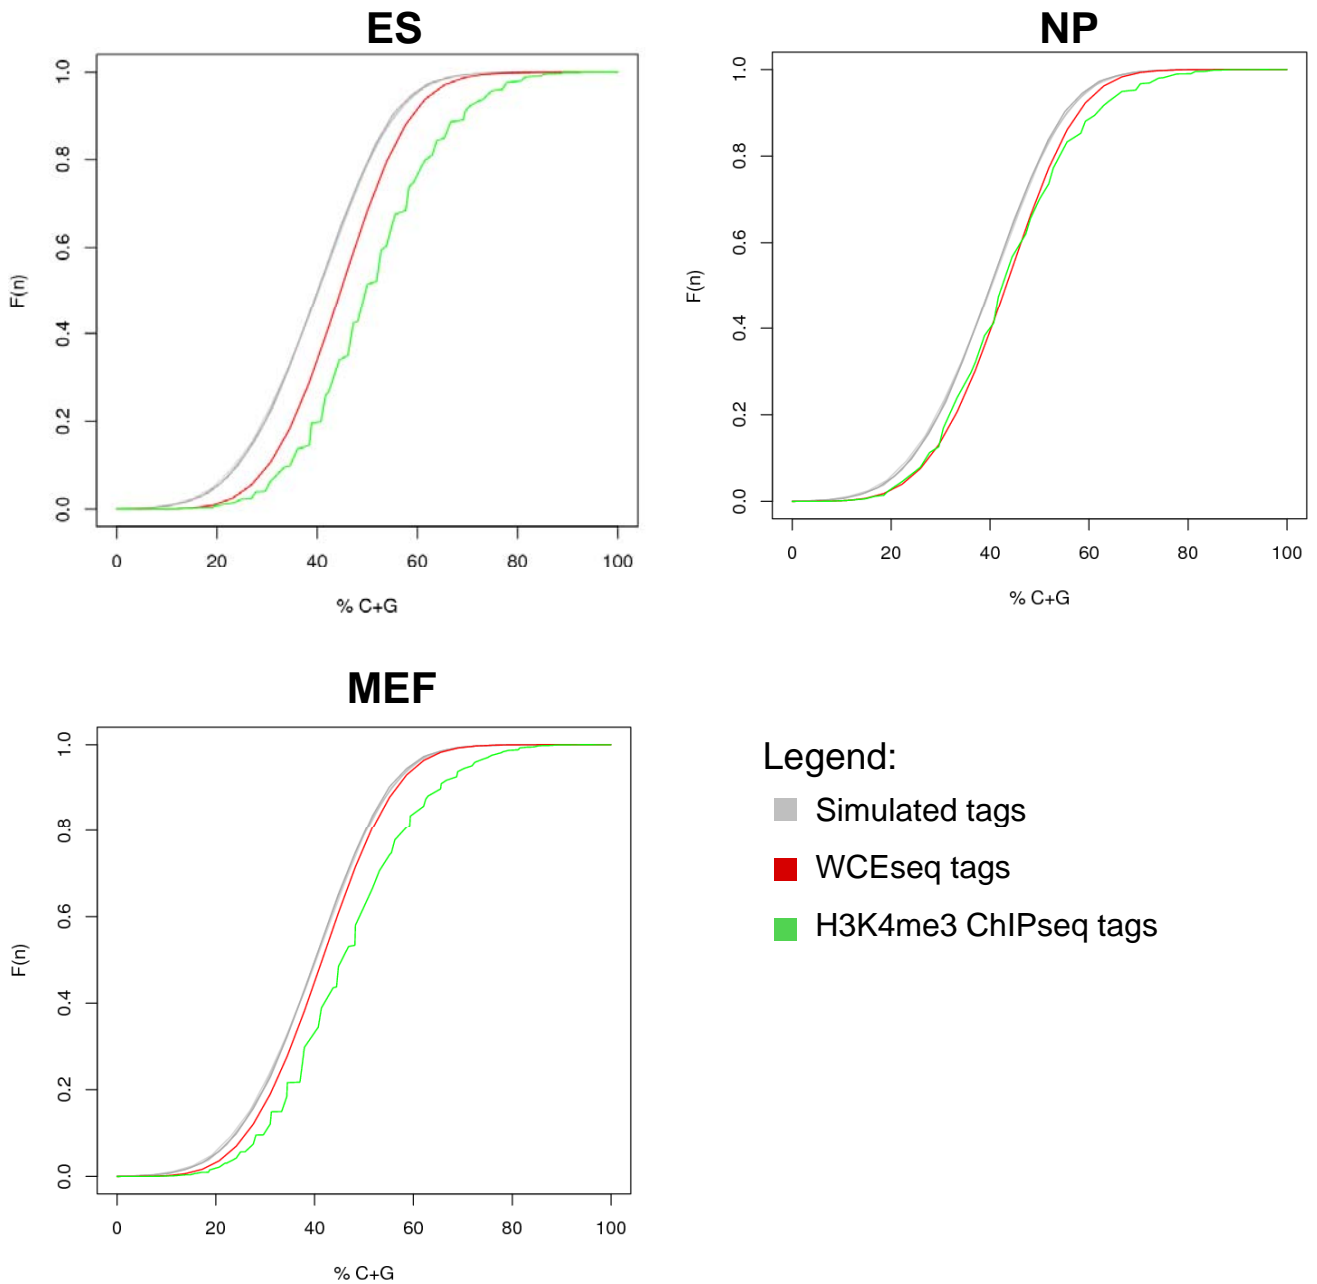

**Supplementary Figure S4.** Cumulative distributions of tags based on their C+G content. Distributions of WCEseq tags (red curves) were relatively close to simulated tags (gray curves; based on 26bp, 27bp, and 29bp tag lengths), indicating that sequence composition bias is relatively mild. As a comparison, similar curves generated from H3K4me3 ChIPseq tags were also drawn (green curves).
