# Supplementary material for: Inherent Signals in Sequencing-Based Chromatin-ImmunoPrecipitation Control Libraries
Source: PLOS journal article supplement (doi:10.1371/journal.pone.0005241), 2009-04-14
Supplement: S1 (10.1371/journal.pone.0005241.s001) [file journal.pone.0005241.s001]

**Supplementary Table S1. Testing a model of gene profile bas on WCEseq tag density**

| WCEseq Library | Number of Genes |                                           |                                             |
|----------------|-----------------|-------------------------------------------|---------------------------------------------|
|                | Total           | Intragenic is more tag-rich than upstream | Intragenic is more tag-rich than downstream |
| ES             | 4205            | 2871<br>(68.28%)                          | 2724<br>(64.78%)                            |
| NP             | 5124            | 3343<br>(65.24%)                          | 3326<br>(64.91%)                            |
| MEF            | 5196            | 3315<br>(63.80%)                          | 3216<br>(61.89%)                            |

A proxy test for tag density model around genes (Supplementary Figure S3) was carried out by comparing the tag density in gene body to the adjacent upstream and downstream regions. Upstream region was defined as the 2-5kbp region 5' upstream of TSS and downstream region was defined as the 2-5kbp region 3' downstream of TES. To avoid potential ambiguity, we considered only genes that were mapped to forward strand and were shorter than 100kbp. Overlapping genes from this list were further removed.
