# Supplementary material for: Inherent Signals in Sequencing-Based Chromatin-ImmunoPrecipitation Control Libraries
Source: PLOS journal article supplement (doi:10.1371/journal.pone.0005241), 2009-04-14
Supplement: S8 (10.1371/journal.pone.0005241.s008) [file journal.pone.0005241.s008]

## Supplementary Figure S6

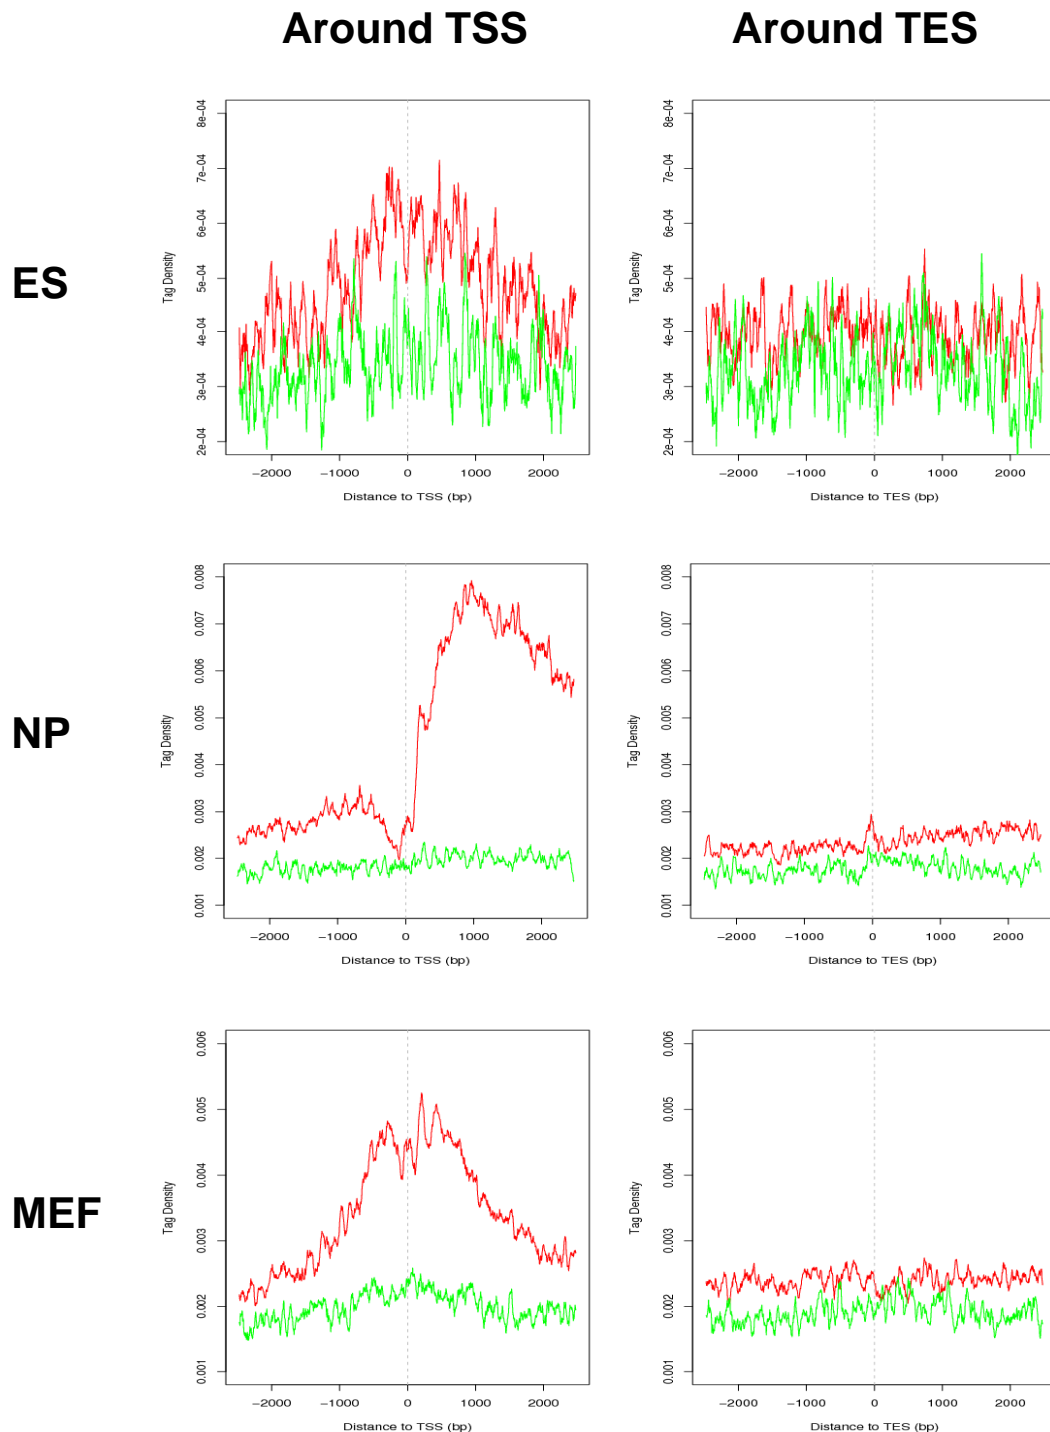

**Supplementary Figure S6.** Expression levels of genes were correlated with CG-content normalized tag density in WCEseq libraries. Density profiles (50bp average) of tags around TSS and TES of highly expressed (red) and lowly expressed (green) genes. The curves show combined density of sense- and antisense-mapped tags. Tags were reweighted based on the CG-content of the corresponding 150bp fragments.
